# Supplementary material
Source: MDPI journal article supplement (https://www.mdpi.com/2073-4344/12/7/759)
Supplement: s1 [file s1]

# An Advanced Approach for MgZnAl-LDH Catalysts Synthesis Used in Claisen-Schmidt Condensation

Rodica Zăvoianu <sup>1,2</sup>, Silvana-Denisa Mihăilă <sup>1,2</sup>, Bogdan Cojocaru <sup>1,2</sup>, Mădălina Tudorache <sup>1,2</sup>, Vasile I. Pârvulescu <sup>1,2</sup>, Octavian Dumitru Pavel <sup>1,2,\*</sup>, Solon Oikonomopoulos <sup>3</sup> and Elisabeth Egholm Jacobsen <sup>3,\*</sup>

- <sup>1</sup> Department of Organic Chemistry, Biochemistry & Catalysis, Faculty of Chemistry, University of Bucharest, 4–12 Regina Elisabeta Blv., 030018 Bucharest, Romania; rodica.zavoianu@chimie.unibuc.ro (R.Z.); silvana.mihaila@s.unibuc.ro (S.-D.M.); bogdan.cojocaru@chimie.unibuc.ro (B.C.); madalina.sandulescu@g.unibuc.ro (M.T.); vasile.parvulescu@chimie.unibuc.ro (V.I.P.)
- <sup>2</sup> Research Center for Catalysts & Catalytic Processes, Faculty of Chemistry, University of Bucharest, 4–12 Blv. Regina Elisabeta, 030018 Bucharest, Romania
- <sup>3</sup> Department of Chemistry, Norwegian University of Science and Technology, Høgskoleringen 5, 7491 Trondheim, Norway; solon.oikonomopoulos@ntnu.no (S.O.)
- \* Correspondence: octavian.pavel@chimie.unibuc.ro (O.D.P.); elisabeth.e.jacobsen@ntnu.no (E.E.J.); Tel.: +40-21-305-1464 (O.D.P.); +47-98-843-559 (E.E.J.)

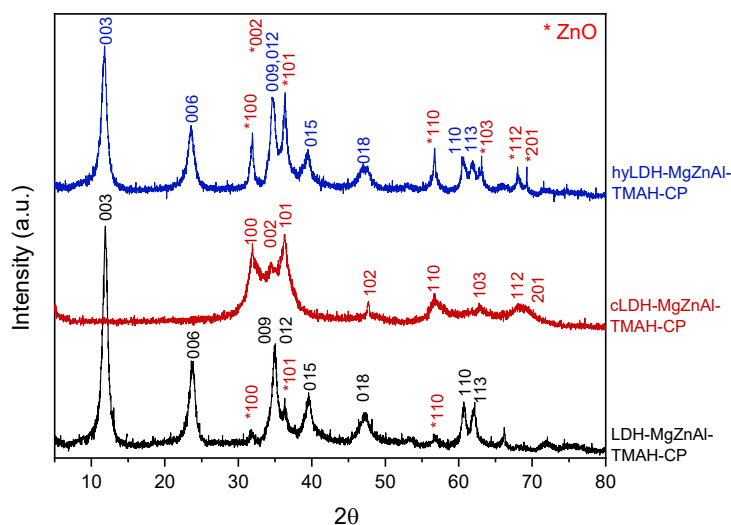

**Figure S1.** XRD patterns of the catalysts recycled; (\* - ZnO).

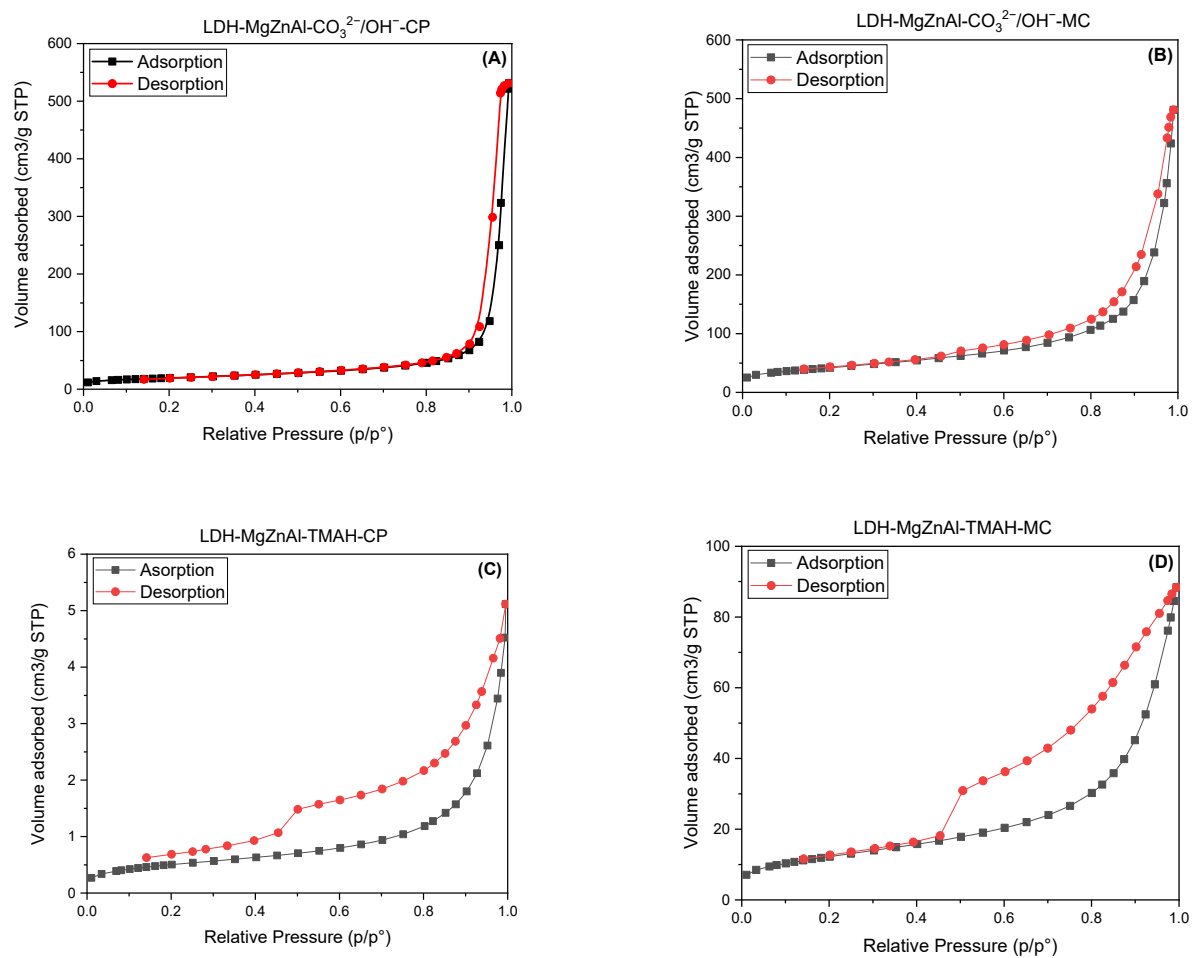

Figure S2. Isotherm linear plot of LDH samples.
